# Supplementary material for: Oligoclonal B cell Expansion and Passenger Fusion Genes Predict Response to Nivolumab in Recurrent Ovarian Cancer: Phase II Kyoto Trial
Source: Research Square preprint supplement (doi:10.21203/rs.3.rs-7492478/v1), 2025-09-11
Supplement: Supplementary file 1 [file e082f4838daf6b79bf85b315.docx]

**Supplementary Figures**

**supplementary Figure 1. Dynamic changes in immune cell marker expression before and after nivolumab treatment**

The expression of key immune cell markers was analyzed in peripheral blood mononuclear cells (PBMCs) before (Pre) and after (Post) nivolumab treatment. The mRNA expression levels of B cell markers (CD24, CD79A, and CD79B), T cell markers (CD4, CD8A, and CD8B), immunosuppressive macrophage marker (CD163), and regulatory T cell marker (FOXP3) were measured using a gene expression microarray. Patients were stratified according to treatment response into responders (CR, PR, and SD, shown in red) and non-responders (PD, shown in blue). Each line connects the pre-treatment and post-treatment values for an individual patient, illustrating the treatment-induced changes in immune marker expression. Significant differences between the pre- and post-treatment levels were determined using paired t-tests and are indicated by asterisks (* p<0.05, ** p<0.01). CR, Complete response; PR, Partial response; SD, Stable disease; PD, Progressive disease

**supplementary Figure 2. Strong correlation between all-frame and in-frame Shannon diversity indices across immune repertoires**

Mean and standard deviation of Shannon diversity indices for both all-frame and in-frame sequences across T cell receptor alpha chain (TRA), T cell receptor beta chain (TRB), B cell immunoglobulin G (IgG), and B cell immunoglobulin M (IgM) repertoires. The scatter plots demonstrate a strong positive correlation between the all-frame (x-axis) and in-frame (y-axis) diversity indices for each repertoire type. The Pearson correlation coefficients (r) were exceptionally high across all the repertoire types: TRA (r=0.9989), TRB (r=0.9997), IgG (r=1.0000), and IgM (r=0.9995), indicating near-perfect linear relationships.

**supplementary Figure 3. Longitudinal analysis of TCR and IGM repertoires in clinical responders following nivolumab treatment**

Longitudinal tracking of T cell receptor alpha chain (TRA), T cell receptor beta chain (TRB), and B cell immunoglobulin M (IgM) repertoires in four super-responders at multiple time points during nivolumab treatment. Each panel displays the frequency distribution of immune receptor clones for each patient and repertoire type at different time points. Patients 11 (CR), 14 (CR), 4 (PR), and 6 (SD[CR]) demonstrated relatively stable clonal distributions in the TRA, TRB, and IGM repertoires throughout the treatment period, in contrast to the dynamic changes observed in the immunoglobulin G repertoires (Figure 2B). CR, Complete response; PR, Partial response; SD, Stable disease

**supplementary Figure 4. Longitudinal analysis of Shannon diversity index patterns across multiple immune repertoires**

Temporal changes in the relative diversity (Shannon index ratio compared to pretreatment) of TRA (top), TRB (middle), and IgM (bottom) repertoires over time (0–700 days) in super responders (left panels: CR, PR, SD[CR]) and poor responders (right panels: SD, PD). Each line represents a single patient.

Super-responders showed a mild-to-moderate decrease in diversity for all three repertoires within the first 100 days of treatment, followed by variable recovery patterns. While this pattern resembled the biphasic trend observed in the IgG repertoire (Figure 2C), the magnitude of diversity reduction was less pronounced in the TRA, TRB, and IgM repertoires. Poor responders exhibited heterogeneous patterns with generally more modest changes in diversity across all repertoires. CR, Complete response; PR, Partial response; SD, Stable disease; PD, Progressive disease; TRA, T cell receptor alpha chain; TRB, T cell receptor beta chain; IgM, Immunoglobulin M; IgG, Immunoglobulin G

**supplementary Figure 5.**

**Volcano plots showing differential gene expression with progressively refined response group definitions**

**a**. Comparison between Responders (CR, PR, n=3) and Non-responders (SD-CR, SD, PD, n=12), showing fewer but more strongly differentially expressed genes, including EEF1A2, KCNQ2, and PI3.

**b**. Comparison between Responders (CR, PR, SD-CR, n=4) and Non-responders (SD, PD, n=11), revealing a small set of differentially expressed genes, with PI3 notably upregulated in responders.

CR, Complete response; PR, Partial response; SD, Stable disease; PD, Progressive disease

**supplementary Figure 6. GO biological process enrichment and Reactome pathway analyses confirm immune activation signatures associated with nivolumab response and fusion gene burden**

**a**. Gene Ontology (GO) enrichment analysis of differentially upregulated genes in Responders (CR, PR, SD_CR, SD, n=7) compared to Non-Responders (PD, n=8). The analysis reveals significant enrichment of immune-related processes, with leukocyte-mediated immunity, leukocyte cell-cell adhesion, and regulation of immune effector processes (highlighted in red boxes) among the most significantly enriched terms.

**b**. GO enrichment analysis of genes positively correlated with fusion gene counts. Similar to panel A, leukocyte-mediated immunity, leukocyte cell-cell adhesion, and regulation of immune effector processes (highlighted in black arrow heads) are significantly enriched, reinforcing the connection between fusion gene burden and immune system activation.

**c**. Reactome pathway analysis of differentially upregulated genes in Responders versus Non-Responders. Prominent enriched processes include neutrophil degranulation, immunoregulatory interactions between lymphoid and non-lymphoid cells, and interleukin-10 signaling.

**d**. Reactome pathway analysis of genes positively correlated with fusion gene counts, demonstrating remarkable concordance with pathways identified in the differential expression analysis, including neutrophil degranulation, immunoregulatory interactions, and interleukin-10 signaling.

CR, Complete response; PR, Partial response; SD, Stable disease; PD, Progressive disease

**Supplementary Tables**

**supplementary Table 1. Summary of detected fusion genes and validation status in ovarian cancer patients treated with nivolumab**

CR, complete response; PR, partial response; SD, stable disease; PD, progressive disease; SD(CR), stable disease with complete response.

Position pattern*: chr, chromosome; ff, forward-forward; fr, forward-reverse; rf, reverse-forward; rr, reverse.

Colored columns indicate identical fusion genes detected in different patients.

No fusion genes were detected in cases 1, 8, 9, 12, 15, 16, 18, and 19 (all PD) or case 2 (SD).

Samples from patients 3 and 10 were not available for fusion gene analyses.

Validation** Gene fusions were validated using reverse transcription-polymerase chain reaction (RT-PCR) and Sanger sequencing.

**supplementary Table 2.** **Differentially expressed gene signatures associated with nivolumab response and fusion gene burden**

| Upregulated genes in Complete Responders (CR) identified by microarray analysis | Upregulated genes in Complete Responders (CR) identified by RNA sequencing | Differentially upregulated genes in Responders (CR, PR, SD) compared to Non-responders (PD) | Genes highly positively correlated with  fusion gene counts |
| --- | --- | --- | --- |
| 22 genes | 82 genes | 812 genes | 1506 genes |
| ATP7B | EEF1A2 | NLRP2 | COL5A3 |
| BAIAP2L2 | KCNQ2 | CLDN16 | IL8 |
| DNAH5 | HNF1B | NCF1C | TNFAIP2 |
| DUX2 | PRODH | LILRA5 | SOCS3 |
| DUX4 | DPPA2 | CEACAM3 | TBC1D10A |
| DUX4L2 | CEACAM7 | VNN3 | HRASLS2 |
| DUX4L4 | C14orf105 | SIGLEC8 | RPL13A |
| EEF1A2 | PADI1 | GZMH | ZC3H12A |
| EPHA7 | CYP2C9 | GZMM | PLEC |
| HNF1B | RXFP1 | RGS11 | LOC100630923 |
| IL12RB2 | TACR3 | GZMB | ITPKC |
| GRAMD3 | NOS1 | AK7 | CALML5 |
| LOC100422737 | PKHD1 | CLDN1 | CXCL3 |
| MMP24 | LEFTY1 | HTRA4 | SBNO2 |
| NHSL1 | GCM1 | ONECUT2 | LOC100126784 |
| PTHLH | HAVCR1 | MMP12 | TMEM191C |
| RHOD | EPS8L3 | RAB37 | RNASE2 |
| RNF182 | SAA2 | KLRC4 | ICAM1 |
| SAA2 | NAPSA | AIM2 | PER1 |
| SLCO4A1 | CDHR2 | ADRA2C | CD300C |
| UNC5A | SHH | VNN1 | AKAP2 |
| VNN1 | BCMO1 | ALG1L2 | NCF1B |
|  | KCNH1 | TNFAIP6 | LILRA4 |
|  | SLC3A1 | PAGE5 | LOC728407 |
|  | PTHLH | TPPP3 | NAGS |
|  | ACE2 | TTC16 | TNRC18P1 |
|  | DNER | SLC34A2 | LDLR |
|  | CYP2C18 | CD33 | HBEGF |
|  | C2CD4A | CD28 | STK10 |
|  | IGFBP1 | PHLDA2 | C5AR1 |
|  | PDZK1 | HTR3A | SH3GL1P2 |
|  | AKR1B10 | CASQ1 | CXCL2 |
|  | LBP | C7orf57 | CEBPB |
|  | EPHA7 | RIMBP3 | CD164L2 |
|  | DLX6 | CD3G | ATP10A |
|  | ANKRD34B | OSM | SERTAD1 |
|  | LY6D | LINC00239 | SNHG1 |
|  | TRIM31 | SPN | ICAM4 |
|  | COL17A1 | TJP3 | CD14 |
|  | KCNG3 | CRIP1 | RAB43 |
|  | PDZK1IP1 | SLPI | OSM |
|  | CASP14 | SLA2 | RASGEF1B |
|  | VNN1 | PCDHA2 | ELF3 |
|  | CLEC4E | WASH1 | SIK1 |
|  | USH1C | RHOF | PIM3 |
|  | CXCL5 | CRYM | DIRAS2 |
|  | CDH16 | CR1L | CEP170B |
|  | CYP2C19 | A4GALT | CLCF1 |
|  | OPN5 | CP | COL6A1 |
|  | CYS1 | AHNAK2 | FOSL2 |
|  | GAL3ST1 | TNFAIP8L2 | BAIAP2 |
|  | TBX15 | ZC3H12D | PET117 |
|  | B4GALNT2 | PROSER2 | TNFSF13 |
|  | TLX3 | SPTA1 | EHD1 |
|  | GJB4 | IL1RAP | HAMP |
|  | LRRC19 | TLR10 | INF2 |
|  | TMEM178B | PTPRH | GNG10 |
|  | BAIAP2L2 | LY75 | AHNAK2 |
|  | SLC1A6 | C5orf49 | ANXA8L2 |
|  | ABP1 | CD52 | NFATC2 |
|  | NR1H4 | LILRB4 | CORO7 |
|  | KCNJ16 | CELSR1 | IRF7 |
|  | SLC52A1 | LILRB3 | LOC653513 |
|  | SGK2 | ADAMDEC1 | ACAP3 |
|  | KLB | CD300LF | UNC13D |
|  | KNG1 | MICB | LAT2 |
|  | SPAG6 | FHAD1 | IL1RAP |
|  | MUC13 | SLC28A1 | AREG |
|  | TREH | FMO3 | CXCL1 |
|  | DLX5 | TMOD1 | NRP2 |
|  | ARHGDIG | FOXJ1 | POSTN |
|  | MMP24 | CATSPERB | TRIM47 |
|  | HRG | CXCR6 | EPHA2 |
|  | MOGAT1 | TFPI2 | ISG20 |
|  | GPR111 | ABHD11 | BIVM |
|  | SFTA2 | GRB7 | EPHB2 |
|  | ANKRD20A19P | RXFP1 | HRH1 |
|  | PIGR | RPS6KL1 | WNT9A |
|  | F2 | CYSLTR2 | TCIRG1 |
|  | MIA2 | ELF3 | APOE |
|  | MIOX | TEKT4P2 | GPR84 |
|  | ARHGEF38 | UPP1 | RHBDF2 |
|  |  | FCGR1A | BMP8B |
|  |  | C8orf4 | HBG2 |
|  |  | CD247 | VSIG4 |
|  |  | HCN2 | TIGD3 |
|  |  | DNAJC5B | FRMD8 |
|  |  | ODF3B | SLC25A45 |
|  |  | KLC3 | HSD17B14 |
|  |  | NLRC4 | ADAM8 |
|  |  | LOC399753 | JAG2 |
|  |  | NTN1 | PRKCDBP |
|  |  | LMTK3 | HSD3B7 |
|  |  | TMPRSS4 | STEAP4 |
|  |  | PITX1 | SERPINE1 |
|  |  | NGEF | SAMD4A |
|  |  | HAL | MESDC1 |
|  |  | CCL18 | ANKLE2 |
|  |  | NLRC3 | ITLN1 |
|  |  | ADAMTS14 | ZFP36 |
|  |  | CYP4F3 | MVP |
|  |  | ABCA13 | HIVEP3 |
|  |  | PLA2G2D | PITPNM1 |
|  |  | PLAC8 | PLD4 |
|  |  | PARP15 | IER3 |
|  |  | PI3 | NCR1 |
|  |  | MT1M | MAP2K3 |
|  |  | PRDM8 | HELZ2 |
|  |  | BLK | BDKRB1 |
|  |  | SFN | LOX |
|  |  | WNT7A | LILRA5 |
|  |  | DPEP2 | OAS3 |
|  |  | C19orf21 | BCL3 |
|  |  | COBL | SELE |
|  |  | TGM2 | NME2 |
|  |  | LGALS9 | TUBB6 |
|  |  | KMO | ZFP36L2 |
|  |  | SLC28A3 | SREBF1 |
|  |  | BCL3 | C7orf55 |
|  |  | HAMP | MAP3K6 |
|  |  | TYMP | UPP1 |
|  |  | IZUMO1 | IL6R |
|  |  | MIPEPP3 | LILRB3 |
|  |  | CCDC96 | SSH3 |
|  |  | HES2 | ANXA1 |
|  |  | CEACAM6 | SNX20 |
|  |  | CD300A | TNFRSF12A |
|  |  | TKTL1 | SLC6A12 |
|  |  | CHIT1 | ARHGAP30 |
|  |  | KNDC1 | LOC440905 |
|  |  | MYH14 | ALDH1A3 |
|  |  | GCNT1 | PISD |
|  |  | HELZ2 | OLFML2B |
|  |  | RPL13A | TCTEX1D1 |
|  |  | PDCD1LG2 | H2AFJ |
|  |  | ZNF486 | NETO1 |
|  |  | DNAAF3 | NFKBID |
|  |  | CCL20 | SLC17A9 |
|  |  | BATF3 | GUCY1A3 |
|  |  | TNFAIP2 | OLR1 |
|  |  | ANXA1 | IL1RN |
|  |  | CCL3 | SH3TC1 |
|  |  | PXN-AS1 | DVL1 |
|  |  | KLF5 | PXN-AS1 |
|  |  | CLDN3 | VAV1 |
|  |  | NFAM1 | BDKRB2 |
|  |  | BIRC3 | SLC28A3 |
|  |  | ICOS | LAMC2 |
|  |  | WASH7P | COL6A2 |
|  |  | SIGLEC14 | FURIN |
|  |  | CDKN2B-AS1 | PIK3R6 |
|  |  | LILRA4 | NCEH1 |
|  |  | P2RX7 | CD276 |
|  |  | SIRPG | LIMS3-LOC440895 |
|  |  | PDZK1IP1 | ZSWIM4 |
|  |  | LIMS3-LOC440895 | MAFB |
|  |  | ALS2CL | LGALS3BP |
|  |  | REM1 | HMOX1 |
|  |  | GJB3 | FAM129B |
|  |  | CD1E | TNFRSF8 |
|  |  | CD48 | CALR3 |
|  |  | NAPSB | BID |
|  |  | ICAM4 | GPR97 |
|  |  | 1-Sep | KLF6 |
|  |  | CYP4F22 | SERPINB8 |
|  |  | GJB1 | PPP1R16B |
|  |  | IGFL1 | CAPN1 |
|  |  | HIST1H3C | SENP3 |
|  |  | SLAMF6 | FOSB |
|  |  | WAS | SPON2 |
|  |  | HLA-DQA1 | ACSL1 |
|  |  | DEFB1 | LILRB4 |
|  |  | ARSI | CHD5 |
|  |  | PSTPIP2 | HK3 |
|  |  | HIST3H2BB | LIPN |
|  |  | EVI2A | LGALS9 |
|  |  | WNT7B | ADAM12 |
|  |  | TMEM191A | RRAD |
|  |  | TNNI2 | TTC7B |
|  |  | CPNE7 | MYOM1 |
|  |  | CD2 | WBP1 |
|  |  | ICAM1 | ADAMTS14 |
|  |  | LYG2 | UNC93B1 |
|  |  | ANKRD33B | TC2N |
|  |  | CXorf65 | C14orf80 |
|  |  | CXCL13 | TRAF3 |
|  |  | UBASH3B | PHLDA3 |
|  |  | SH2D1A | SLC35E4 |
|  |  | POLR2J2 | FCAR |
|  |  | ATP11A | ANXA2 |
|  |  | CDR2L | WNT7A |
|  |  | KLRC3 | SH2D5 |
|  |  | MUC16 | ESRRA |
|  |  | APOL4 | NMB |
|  |  | GPR171 | LOC344967 |
|  |  | SPAG8 | HCAR3 |
|  |  | CCDC64 | ARAP1 |
|  |  | PPP1R3G | SELL |
|  |  | HSPB1 | TMEM2 |
|  |  | TRIM47 | KLRC4 |
|  |  | IL15 | HPGD |
|  |  | BAIAP3 | KLRC1 |
|  |  | APOL3 | ARFRP1 |
|  |  | CLEC4E | FLNC |
|  |  | TMC5 | CCL26 |
|  |  | LAMA5 | LIMS1 |
|  |  | LOC100129480 | ARL14 |
|  |  | ERMN | ZBTB42 |
|  |  | C19orf33 | HAS1 |
|  |  | CYB5D1 | CPLX3 |
|  |  | MLIP | OXCT2 |
|  |  | FOXD4 | CRIP1 |
|  |  | OTOA | TTC9 |
|  |  | IL1RN | SIPA1 |
|  |  | NETO1 | RASL10A |
|  |  | VSTM2L | TM4SF1 |
|  |  | GIPC3 | PFKFB3 |
|  |  | CHST6 | LHFPL2 |
|  |  | TRAT1 | VWA1 |
|  |  | POTEF | GJA3 |
|  |  | HIST1H2BB | DUSP3 |
|  |  | WDR38 | DOCK4 |
|  |  | DLEC1 | SOWAHC |
|  |  | MS4A2 | SIGIRR |
|  |  | ARL4A | MX1 |
|  |  | ADAP1 | MUL1 |
|  |  | FCGR2B | PIM1 |
|  |  | GPT | LY86 |
|  |  | ALDH8A1 | FCGR2B |
|  |  | GPR111 | CCDC73 |
|  |  | MVP | GPR37L1 |
|  |  | C11orf91 | PRH2 |
|  |  | WDR63 | APOC1 |
|  |  | CA2 | TNFSF11 |
|  |  | IL8 | IRF1 |
|  |  | OSBP2 | PARP12 |
|  |  | UPK3B | ZBTB7A |
|  |  | TRAF3IP3 | HLA-A |
|  |  | SIGLEC15 | HLA-E |
|  |  | LRRC33 | EFNA1 |
|  |  | HSD3B7 | C17orf99 |
|  |  | SCML4 | MYPOP |
|  |  | P2RY8 | CD300A |
|  |  | FOLR3 | ADAM28 |
|  |  | HCK | CTSH |
|  |  | SYNC | ANXA11 |
|  |  | C5AR1 | S1PR4 |
|  |  | HK3 | ITGAX |
|  |  | TMEM184A | CKB |
|  |  | SLC35E4 | CTAGE6P |
|  |  | TMEM86B | RPL23AP7 |
|  |  | FOXQ1 | VSTM2L |
|  |  | P2RY14 | MROH1 |
|  |  | RNF213 | MYO1F |
|  |  | CYP4F11 | HBB |
|  |  | CEACAM1 | HCK |
|  |  | CD69 | KDM6B |
|  |  | ANKRD22 | FN1 |
|  |  | CXorf30 | TNFSF10 |
|  |  | KIAA1161 | TSPAN14 |
|  |  | CIITA | SLC10A6 |
|  |  | TMEM102 | PIK3CD |
|  |  | KIR3DX1 | CD97 |
|  |  | PIGZ | ZNF469 |
|  |  | FAM25A | S100A6 |
|  |  | ELOVL7 | FOSL1 |
|  |  | BAIAP2 | SPI1 |
|  |  | IFI30 | RNF213 |
|  |  | RRAD | DMRT3 |
|  |  | NCF1 | SLC37A2 |
|  |  | MATK | PRKX |
|  |  | NNMT | MIR22HG |
|  |  | C14orf80 | FAM134B |
|  |  | TC2N | ACTG1P4 |
|  |  | CCDC71L | CLEC12A |
|  |  | CD180 | FHL5 |
|  |  | ELMO3 | ZNF593 |
|  |  | PDE4C | LOC158376 |
|  |  | LAMC2 | CXCL16 |
|  |  | TPSAB1 | HLA-B |
|  |  | SLC22A13 | GFI1 |
|  |  | RTP4 | IFI35 |
|  |  | C20orf24 | ABCD1 |
|  |  | DNAI1 | COL18A1 |
|  |  | ITGB2 | ABHD15 |
|  |  | APOL2 | SPHK1 |
|  |  | MS4A14 | SLC9A3R2 |
|  |  | LLGL2 | LILRA2 |
|  |  | GRIK3 | MMP8 |
|  |  | CKMT1B | HTRA4 |
|  |  | LRRC46 | RAB11FIP5 |
|  |  | TREM1 | TMEM191A |
|  |  | SLC16A5 | MYO1C |
|  |  | ITPKC | ALAS2 |
|  |  | ZDHHC11 | TUBB1 |
|  |  | SPATA18 | ANGPTL6 |
|  |  | DOK3 | PNPLA2 |
|  |  | LYZ | MMP19 |
|  |  | SERTAD1 | PMEPA1 |
|  |  | GPR174 | PIEZO1 |
|  |  | ARHGDIG | CD68 |
|  |  | ABHD15 | CTAGE11P |
|  |  | HP | KIAA0040 |
|  |  | ATP6V1B1 | C1orf170 |
|  |  | DNAH5 | ANKRD20A12P |
|  |  | BCL2A1 | DUSP10 |
|  |  | C17orf72 | SIGLEC9 |
|  |  | MFI2 | MIR3687 |
|  |  | RPLP0P2 | ARHGDIA |
|  |  | HBA2 | STX11 |
|  |  | DNMT3B | ERRFI1 |
|  |  | MYH15 | FSTL3 |
|  |  | CKB | CEACAM21 |
|  |  | HCLS1 | CCDC85C |
|  |  | SH2B2 | PLEK |
|  |  | FUT1 | GABRR2 |
|  |  | AQP9 | PALM2-AKAP2 |
|  |  | NOTUM | LIF |
|  |  | EBF3 | C2orf54 |
|  |  | FBXL15 | RFX2 |
|  |  | ZNF683 | C5AR2 |
|  |  | BBC3 | BATF3 |
|  |  | SLC19A3 | IFI30 |
|  |  | DOHH | JUN |
|  |  | RENBP | ITGB5 |
|  |  | KLK6 | FLJ20021 |
|  |  | MYO1G | MARCO |
|  |  | CCDC73 | PARP9 |
|  |  | PKMYT1 | LOC653786 |
|  |  | UBE2S | LRRK1 |
|  |  | HIST3H2A | SLC28A1 |
|  |  | ARRDC1 | CRISPLD2 |
|  |  | ISG15 | HLA-DRB1 |
|  |  | SAMD10 | ARRDC2 |
|  |  | C12orf70 | HNRNPUL2 |
|  |  | DIRAS1 | SPTBN4 |
|  |  | PAQR4 | TREM1 |
|  |  | LGALS3 | KCNK1 |
|  |  | TNFSF13B | CYBA |
|  |  | OR1J2 | RASIP1 |
|  |  | IGFLR1 | PRF1 |
|  |  | PCSK4 | RAB26 |
|  |  | KIF17 | FAM20C |
|  |  | HLA-DQB1 | YIF1A |
|  |  | IDO1 | MMP13 |
|  |  | CCL4 | SEMA6B |
|  |  | CD27 | NPTXR |
|  |  | LYNX1 | ARID3B |
|  |  | ERAP2 | RILP |
|  |  | IL12RB1 | MYOF |
|  |  | KIFC2 | SDF2L1 |
|  |  | EMR4P | FBXL15 |
|  |  | FA2H | RND1 |
|  |  | TMEM238 | KLF9 |
|  |  | GALE | DOK3 |
|  |  | CCDC19 | P2RY14 |
|  |  | LILRB1 | LYL1 |
|  |  | IL6R | SPTBN2 |
|  |  | APLNR | CIITA |
|  |  | KLK8 | ERBB2 |
|  |  | DOK2 | DPEP2 |
|  |  | GPR114 | FOS |
|  |  | FCRL1 | GNA15 |
|  |  | C15orf62 | FTH1 |
|  |  | HIST1H2AI | FPR1 |
|  |  | TGM1 | LINC00346 |
|  |  | C7orf55 | DGKB |
|  |  | CCDC114 | CDRT1 |
|  |  | IFI35 | LANCL3 |
|  |  | TMEM229B | NTN1 |
|  |  | BTC | ARHGEF1 |
|  |  | TIGIT | NLRC5 |
|  |  | GPR97 | HEATR4 |
|  |  | HSF5 | PVRL2 |
|  |  | KLHL30 | BCL6 |
|  |  | CYP24A1 | APOBR |
|  |  | SNORA5B | ITGA3 |
|  |  | HOXA1 | SLC4A1 |
|  |  | LOC613037 | KYNU |
|  |  | IER5L | TRIM17 |
|  |  | UBASH3A | HES4 |
|  |  | SUSD2 | CLDN14 |
|  |  | OCEL1 | GIPC3 |
|  |  | P2RY11 | IFIT3 |
|  |  | BCL2L14 | C10orf32 |
|  |  | ITGB3 | PKD2L1 |
|  |  | BATF2 | FAM22A |
|  |  | TNFSF11 | ICAM5 |
|  |  | PSMB10 | ITGB2 |
|  |  | FSTL3 | CD72 |
|  |  | CYP2C9 | REM1 |
|  |  | RASSF7 | BIRC3 |
|  |  | DNAAF1 | TRPM2 |
|  |  | SERPINB8 | GALNS |
|  |  | PPBP | PTPRN |
|  |  | PPAPDC2 | RNF152 |
|  |  | FCHO1 | FCGR1A |
|  |  | GUCY1A3 | PCNXL3 |
|  |  | TREML1 | NOTUM |
|  |  | TBX15 | NME3 |
|  |  | EOMES | GUCY1B3 |
|  |  | LENG9 | SLA2 |
|  |  | SIRT7 | NNMT |
|  |  | MMP1 | RABGGTA |
|  |  | ITGB8 | GTPBP6 |
|  |  | SBNO2 | MAFG |
|  |  | APOL1 | NR4A2 |
|  |  | INF2 | CDC42BPG |
|  |  | CDH16 | CCDC71L |
|  |  | S1PR4 | ALS2CL |
|  |  | ANPEP | KIFC2 |
|  |  | FCGR1C | IRF2BPL |
|  |  | NCEH1 | ABTB1 |
|  |  | IKBKG | PPP1R3D |
|  |  | KCNN4 | CEACAM3 |
|  |  | MC1R | ZC3H12D |
|  |  | HS3ST3A1 | GZMH |
|  |  | CRIP2 | DPYD |
|  |  | CACNG4 | HIF1A |
|  |  | ARHGAP9 | RTKN |
|  |  | ALDH3B1 | ACAD11 |
|  |  | SOWAHB | SFN |
|  |  | CXCL2 | SDHAF1 |
|  |  | MIR21 | MAP2K2 |
|  |  | FLT3 | TFEC |
|  |  | DNAJB13 | APOLD1 |
|  |  | CTAGE6P | SDC3 |
|  |  | GLDC | LGALS9B |
|  |  | FAM173A | BRICD5 |
|  |  | CEBPB | RASSF1 |
|  |  | FAM83F | GPNMB |
|  |  | SLC4A11 | ARHGAP23 |
|  |  | DGCR6L | MEGF6 |
|  |  | ATP10A | P2RY8 |
|  |  | FOLR1 | PPBP |
|  |  | NAGS | CSF1 |
|  |  | SLC5A1 | KRTAP5-10 |
|  |  | HES4 | IL16 |
|  |  | CD84 | LOC595101 |
|  |  | SPP1 | SAMHD1 |
|  |  | FAM129B | CTRC |
|  |  | TREX1 | TREX1 |
|  |  | POR | KRT16 |
|  |  | DIRAS2 | LAIR1 |
|  |  | RGS9BP | TPST2 |
|  |  | SIGLEC9 | BCAR1 |
|  |  | F2 | SLMO2 |
|  |  | S100A6 | DDX39A |
|  |  | OR2A7 | SPSB1 |
|  |  | FOXD4L1 | PRG2 |
|  |  | ANXA8L2 | MARK3 |
|  |  | ARHGEF35 | SNORA34 |
|  |  | TJP2 | LAMA5 |
|  |  | TRAPPC2P1 | SSSCA1 |
|  |  | GNLY | CLN5 |
|  |  | CBLC | AMOTL2 |
|  |  | CALCR | SYNC |
|  |  | THRB | ALDH3B1 |
|  |  | GAS2L1 | HS3ST3A1 |
|  |  | SLC39A4 | SCARF1 |
|  |  | ELL3 | DOHH |
|  |  | RDH13 | LILRB1 |
|  |  | DOC2B | ARFGAP1 |
|  |  | CCDC152 | HSPA6 |
|  |  | PRR19 | SIGLEC5 |
|  |  | FAM188B | GPR4 |
|  |  | UCA1 | HSF5 |
|  |  | PRODH | NCF1C |
|  |  | HSH2D | ZNF512B |
|  |  | RADIL | GNLY |
|  |  | TNIP3 | PLIN4 |
|  |  | MMP10 | TAS1R3 |
|  |  | PPARGC1B | LRRN4 |
|  |  | ZSWIM4 | SMIM12 |
|  |  | SREBF1 | DGCR6L |
|  |  | OR1J4 | CD28 |
|  |  | THAP11 | CCDC85B |
|  |  | KPNA7 | HCLS1 |
|  |  | MAFG | E2F2 |
|  |  | SIRPB2 | CD300E |
|  |  | MILR1 | KLHL26 |
|  |  | TNFRSF10C | CLDN4 |
|  |  | MUC1 | HBD |
|  |  | PTPRU | OAS2 |
|  |  | AIM1 | CLEC6A |
|  |  | ACSL5 | ULK3 |
|  |  | SLC7A4 | KIR3DX1 |
|  |  | LRRC56 | PI4KA |
|  |  | ACSL1 | CDR2L |
|  |  | EFNA1 | C1QA |
|  |  | ADAP2 | LOC284454 |
|  |  | NXPH4 | EML3 |
|  |  | CD68 | SPTA1 |
|  |  | SCIMP | PSMB10 |
|  |  | ZMYND10 | VMO1 |
|  |  | SLAMF7 | ST18 |
|  |  | CLEC1A | GPR171 |
|  |  | MUC2 | CORO1A |
|  |  | RPL21P44 | ANPEP |
|  |  | ACER2 | RGS9BP |
|  |  | KCNQ2 | MAP6D1 |
|  |  | C17orf89 | SPATA32 |
|  |  | ACE | PF4 |
|  |  | ANKRD20A11P | CFL1 |
|  |  | SNX20 | EREG |
|  |  | SPSB2 | FAM49A |
|  |  | ABCG1 | SPATA2L |
|  |  | THPO | NKG7 |
|  |  | GFI1 | H3F3C |
|  |  | CCDC64B | SLC22A13 |
|  |  | DNAH3 | BSND |
|  |  | GP6 | CALCR |
|  |  | SH2D3A | HIST2H3D |
|  |  | DEFB4A | TDRD9 |
|  |  | GPR18 | RAMP1 |
|  |  | ARRDC2 | RNASEK |
|  |  | GIMAP7 | PI16 |
|  |  | E2F1 | ELL3 |
|  |  | MPZL3 | WAS |
|  |  | SHANK2 | VPS37B |
|  |  | H2AFJ | FAM214B |
|  |  | GUSBP2 | CCR1 |
|  |  | AQPEP | PNRC2 |
|  |  | SPATA32 | ARHGEF35 |
|  |  | GUSBP3 | FAM219B |
|  |  | FGF18 | KLRC3 |
|  |  | GABRR2 | ATP6V0B |
|  |  | ANKHD1-EIF4EBP3 | OPLAH |
|  |  | TMC8 | ITGB3 |
|  |  | HDAC9 | PILRA |
|  |  | ATP2C2 | NR4A1 |
|  |  | TMEM74B | LOC100129083 |
|  |  | MMP9 | PLXDC1 |
|  |  | CORO1A | GALE |
|  |  | ZBTB7A | PKD1L1 |
|  |  | IL2RA | SAMSN1 |
|  |  | ROS1 | PTPN1 |
|  |  | HLA-DQA2 | CD82 |
|  |  | PAX8 | FCGR3B |
|  |  | GATSL2 | C18orf25 |
|  |  | SAMD3 | G0S2 |
|  |  | MYO1F | RHOF |
|  |  | ZNF185 | ACADS |
|  |  | MROH6 | TRNP1 |
|  |  | KIAA1804 | EPSTI1 |
|  |  | GK | ZNF296 |
|  |  | RNF182 | AURKAIP1 |
|  |  | CLDN4 | CNFN |
|  |  | ACADS | GZMM |
|  |  | KCNJ10 | LINC00176 |
|  |  | DTHD1 | ALOX5 |
|  |  | HERC2P3 | OXLD1 |
|  |  | TAP1 | SERINC5 |
|  |  | APOE | PNKP |
|  |  | CARD9 | RFX1 |
|  |  | C16orf13 | ABHD11 |
|  |  | PKP3 | LMO7 |
|  |  | ZNF826P | PARP10 |
|  |  | ZNF530 | POR |
|  |  | IBSP | TMOD1 |
|  |  | UAP1L1 | AHNAK |
|  |  | KRT7 | HNRNPA1P33 |
|  |  | CLEC6A | PLEKHN1 |
|  |  | FGFR3 | CIRBP-AS1 |
|  |  | TAS1R3 | CYFIP1 |
|  |  | LAIR1 | HSPA12A |
|  |  | HES6 | TYMP |
|  |  | LOC100652768 | PLVAP |
|  |  | SOWAHC | C4orf32 |
|  |  | SLC26A4 | CARD9 |
|  |  | RAPSN | TRAT1 |
|  |  | NCF1B | COL1A1 |
|  |  | ATP8B3 | C1QC |
|  |  | NKG7 | AGPAT9 |
|  |  | HBG2 | CTSS |
|  |  | PRSS22 | KRT7 |
|  |  | FPR2 | SLC15A3 |
|  |  | LOC100507463 | PTPRU |
|  |  | CCR5 | GPR27 |
|  |  | DNASE1L3 | CPA4 |
|  |  | GPR19 | CALHM3 |
|  |  | MYOM1 | RGS16 |
|  |  | LCA5L | EVPL |
|  |  | CSF3R | ZNF707 |
|  |  | TAP2 | CWH43 |
|  |  | CYBA | CPT1A |
|  |  | C8G | MAP3K8 |
|  |  | MAP3K6 | GRK6 |
|  |  | SLC3A1 | IL10 |
|  |  | CCDC85C | ABCG1 |
|  |  | GIPR | OAS1 |
|  |  | CCNA1 | RIC8A |
|  |  | ICOSLG | ARHGAP9 |
|  |  | ALDH1A3 | GNB2 |
|  |  | CEP170B | LYG1 |
|  |  | RGS19 | ANKRD9 |
|  |  | PGP | PRSS30P |
|  |  | APOC1 | EPS8L2 |
|  |  | STEAP3 | TNN |
|  |  | PIEZO1 | PPYR1 |
|  |  | C16orf55 | NEAT1 |
|  |  | GPR27 | SLC16A6 |
|  |  | LY86 | PVRL4 |
|  |  | ZNF671 | PKP3 |
|  |  | ADCK1 | EIF5 |
|  |  | FCAR | WDR88 |
|  |  | TNNT1 | OSBPL3 |
|  |  | TNFSF13 | NACC2 |
|  |  | UNC5A | TMC6 |
|  |  | ETV7 | CDKN2AIP |
|  |  | TLE1 | GAS6-AS1 |
|  |  | PPM1N | TAGAP |
|  |  | RARRES3 | RNF215 |
|  |  | CCDC78 | PGP |
|  |  | KYNU | ZMYND15 |
|  |  | CD3E | LOC100652768 |
|  |  | BCAM | TRMT112 |
|  |  | DNAH7 | TNNI2 |
|  |  | PSME1 | LYPD2 |
|  |  | MYBL1 | RAP2C |
|  |  | HEY1 | RASGRP4 |
|  |  | ZNF79 | RAMP3 |
|  |  | TARP | MIPEPP3 |
|  |  | ZIC2 | HSPA1A |
|  |  | RNF125 | BCR |
|  |  | GNA15 | MAP4K2 |
|  |  | STAT4 | CASQ1 |
|  |  | ITIH4 | GEM |
|  |  | ARMC3 | CCPG1 |
|  |  | HBB | CISD3 |
|  |  | LOC100289137 | ASB2 |
|  |  | TRPA1 | C11orf35 |
|  |  | C9orf171 | PRPH |
|  |  | ITGB7 | TRIM65 |
|  |  | NPR1 | RIPK4 |
|  |  | ERCC5 | ACOT7 |
|  |  | EDA2R | ASMTL-AS1 |
|  |  | ITGB6 | KANK3 |
|  |  | SLC37A2 | THEMIS2 |
|  |  | HLA-DRB6 | ATP6V1B1 |
|  |  | LRRC43 | BBC3 |
|  |  | LRRC32 | MYH16 |
|  |  | SLAMF8 | GJB3 |
|  |  | SDHA | PLXND1 |
|  |  | IL1RL1 | CALHM2 |
|  |  | ITK | ERMN |
|  |  | PLD6 | SIRPB2 |
|  |  | ZSCAN22 | CXCR1 |
|  |  | ALOX5 | KCTD12 |
|  |  | ITGAL | WWC1 |
|  |  | SLC7A5P2 | PREX1 |
|  |  | SLC22A14 | SIRT7 |
|  |  | ANXA2 | ZDHHC18 |
|  |  | BIK | FNDC7 |
|  |  | RPL23AP7 | C1QB |
|  |  | COMTD1 | KLF16 |
|  |  | HOXA4 | CHST4 |
|  |  | GALNT4 | KIFC3 |
|  |  | IL10 | GOLGA6A |
|  |  | SPI1 | LRRC56 |
|  |  | LAMP3 | CYP4F3 |
|  |  | SECTM1 | DDA1 |
|  |  | ERBB2 | CD300LF |
|  |  | TMEM45B | GPR132 |
|  |  | FAM90A1 | ABL2 |
|  |  | CCNE1 | PIK3R5 |
|  |  | PTPN6 | LOC100289137 |
|  |  | NEURL2 | CELSR2 |
|  |  | LOC595101 | UGCG |
|  |  | ICAM5 | TNFAIP6 |
|  |  | EXOC3L2 | IL6 |
|  |  | C5AR2 | POTEG |
|  |  | PARP9 | TJP2 |
|  |  | ITGAX | PPT2-EGFL8 |
|  |  | WDR62 | CD93 |
|  |  | RBP4 | NUMBL |
|  |  | TYROBP | TRAPPC5 |
|  |  | FDX1L | SPP1 |
|  |  | IRF7 | ZNF600 |
|  |  | AREG | ADSSL1 |
|  |  | MMP28 | CASP5 |
|  |  | MMP25 | PPP1R9B |
|  |  | CACNA1F | SLC20A1 |
|  |  | LIF | SLCO3A1 |
|  |  | TBX20 | KRTAP5-7 |
|  |  | SUV420H2 | FLYWCH1 |
|  |  | XCL2 | SEC14L2 |
|  |  | CLDN10 | CCL3 |
|  |  | FBXL16 | TBL3 |
|  |  | DSP | ECI1 |
|  |  | APBB1IP | ZNF598 |
|  |  | CXCL3 | ERAP2 |
|  |  | C11orf35 | NEB |
|  |  | CD70 | TNIP3 |
|  |  | FCGR2C | SCYL1 |
|  |  | VWA3B | ITPRIP |
|  |  | MAEL | RCC1 |
|  |  | EPHA2 | DAGLA |
|  |  | LRG1 | MTHFD2 |
|  |  | RFX2 | BIN2 |
|  |  | HEATR8-TTC4 | HIST1H4K |
|  |  | ZNF526 | POMGNT1 |
|  |  | ANKRD24 | ATP11A |
|  |  | PADI1 | PLXNA1 |
|  |  | MGLL | MRO |
|  |  | TMEM231 | OR51E2 |
|  |  | PTPRCAP | HIP1R |
|  |  | TFAP2C | SAMD9 |
|  |  | RILP | CLTB |
|  |  | LAT2 | GNB1L |
|  |  | DCAF4 | ATP5D |
|  |  | C1QB | HEMGN |
|  |  | CCL8 | KRT14 |
|  |  | MT1E | ULBP2 |
|  |  | OAS2 | COTL1 |
|  |  | CECR6 | SDHA |
|  |  | AKAP2 | FAP |
|  |  | CXCL10 | MTMR3 |
|  |  | EEF1A2 | ACE |
|  |  | FAM83E | HS3ST2 |
|  |  | LOC402160 | CPVL |
|  |  | SMPD2 | ELMSAN1 |
|  |  | HIST2H3D | DKK2 |
|  |  | ROPN1L | LCT |
|  |  | CISD3 | ZC3H3 |
|  |  | NQO2 | CD226 |
|  |  | ASPSCR1 | FABP3 |
|  |  | PSMG3 | SMG1P1 |
|  |  | PARD6B | LRRC25 |
|  |  | IL1B | RENBP |
|  |  | KRT86 | XIRP1 |
|  |  | KIAA1211L | TTLL12 |
|  |  | CHDC2 | EMR4P |
|  |  | CD36 | GALNT6 |
|  |  | KLK11 | TMEM222 |
|  |  | PRSS16 | LNPEP |
|  |  | CCDC144C | C12orf70 |
|  |  | CABLES2 | NFAM1 |
|  |  | C5orf60 | LRFN4 |
|  |  | MMP24 | HS3ST3B1 |
|  |  | NECAB1 | GZMB |
|  |  | DTX2 | AGRN |
|  |  | UBXN11 | CSF3R |
|  |  | C14orf79 | PDCD1LG2 |
|  |  | FOXF2 | THPO |
|  |  | CKMT1A | C17orf59 |
|  |  | GRIN3B | CD80 |
|  |  | A1BG-AS1 | CTNNBL1 |
|  |  | CLEC12A | ADM |
|  |  | GOLGA2P5 | NDUFS8 |
|  |  | MMP13 | SPINT1 |
|  |  | CDH13 | EVI2A |
|  |  | CXCR2P1 | MZT2A |
|  |  | CAMKK1 | NCF1 |
|  |  | MMP15 | DNASE2 |
|  |  | MLLT4-AS1 | TMEM51 |
|  |  | MIR24-2 | KRTAP5-8 |
|  |  | DGKA | HID1 |
|  |  | LRRC73 | OR5B21 |
|  |  | CD4 | CHST1 |
|  |  | METRNL | MYL5 |
|  |  | MOCS3 | JAG1 |
|  |  | PCDHA13 | CD84 |
|  |  | SOX17 | NDUFB10 |
|  |  | CD226 | GIPC1 |
|  |  | IL32 | TIMM23 |
|  |  | LOC100268168 | S100A5 |
|  |  | MAP3K8 | SART1 |
|  |  | KIAA0226L | ZCCHC6 |
|  |  | CALB1 | KLC2 |
|  |  | BCL2L15 | TNFRSF10A |
|  |  | TTLL12 | TIGD5 |
|  |  | OPLAH | CTGF |
|  |  | OAS3 | FNIP2 |
|  |  | ST6GALNAC1 | SLC35E1 |
|  |  | TTC40 | PQLC2 |
|  |  | FAM83H | KLK4 |
|  |  | RSPH1 | SERPINB2 |
|  |  | C20orf118 | SIRT6 |
|  |  | BIN2 | CELSR1 |
|  |  | ATP7B | GGA3 |
|  |  | ORMDL2 | GPRIN3 |
|  |  | PUS1 | C4orf36 |
|  |  | TBCD | FADS3 |
|  |  | MAP6D1 | MYH14 |
|  |  | CTLA4 | TNFSF14 |
|  |  | NDUFS7 | SMPD1 |
|  |  | ACE2 | DGCR6 |
|  |  | CITED4 | GAS2L1 |
|  |  | TMEM160 | ZDHHC24 |
|  |  | PLEC | MBP |
|  |  | PIK3R5 | NRBP2 |
|  |  | GBP5 | DGKQ |
|  |  | OSCAR | GGACT |
|  |  | CYP2D7P1 | GBP1 |
|  |  | PPP1R3D | WISP1 |
|  |  | SYT17 | FFAR4 |
|  |  | CHCHD10 | CLEC12B |
|  |  | WFDC2 | CLECL1 |
|  |  | LTB | IL1RL1 |
|  |  | PDCD1 | TPSAB1 |
|  |  | DOK7 | TIMD4 |
|  |  | CDHR2 | PDLIM7 |
|  |  | PPL | KANK1 |
|  |  | CADM3 | SGMS2 |
|  |  | MPL | DOCK8 |
|  |  | GRWD1 | COPE |
|  |  | IL15RA | ZGLP1 |
|  |  | CDC25B | MIR941-3 |
|  |  | TMC6 | ARIH1 |
|  |  | CPA4 | GPAT2 |
|  |  | ASRGL1 | GAL |
|  |  |  | FOXD2 |
|  |  |  | DPPA2P3 |
|  |  |  | ARRDC5 |
|  |  |  | TMEM255B |
|  |  |  | TNFSF8 |
|  |  |  | ZNF217 |
|  |  |  | IFIT1 |
|  |  |  | MROH6 |
|  |  |  | TSC22D3 |
|  |  |  | FAM108A1 |
|  |  |  | SIGLEC14 |
|  |  |  | STRN4 |
|  |  |  | PHOSPHO1 |
|  |  |  | GATSL2 |
|  |  |  | P2RY6 |
|  |  |  | C11orf91 |
|  |  |  | FAM21C |
|  |  |  | SMEK1 |
|  |  |  | WASH7P |
|  |  |  | SRC |
|  |  |  | IFI6 |
|  |  |  | NACC1 |
|  |  |  | ZDHHC19 |
|  |  |  | ATP2A2 |
|  |  |  | NDUFC2 |
|  |  |  | GRIK3 |
|  |  |  | ASAH1 |
|  |  |  | SLCO1C1 |
|  |  |  | CLDN9 |
|  |  |  | VILL |
|  |  |  | POTEF |
|  |  |  | PEF1 |
|  |  |  | MUC12 |
|  |  |  | ELFN1 |
|  |  |  | LY75 |
|  |  |  | GSDMD |
|  |  |  | ELOVL1 |
|  |  |  | MGAT5 |
|  |  |  | BCL10 |
|  |  |  | ICOSLG |
|  |  |  | LRP8 |
|  |  |  | COLEC12 |
|  |  |  | HGS |
|  |  |  | CD4 |
|  |  |  | TUBB2A |
|  |  |  | C1orf177 |
|  |  |  | RGS11 |
|  |  |  | LLGL2 |
|  |  |  | CD48 |
|  |  |  | SLPI |
|  |  |  | WDR91 |
|  |  |  | WASH3P |
|  |  |  | C20orf24 |
|  |  |  | MATK |
|  |  |  | C2 |
|  |  |  | TREML1 |
|  |  |  | SRD5A3 |
|  |  |  | ZCCHC2 |
|  |  |  | PRSS22 |
|  |  |  | CCDC155 |
|  |  |  | MGAT4B |
|  |  |  | SLC7A5P2 |
|  |  |  | PKIB |
|  |  |  | TRIM14 |
|  |  |  | ANKDD1A |
|  |  |  | FOLR2 |
|  |  |  | RPA4 |
|  |  |  | DOK2 |
|  |  |  | TPM4 |
|  |  |  | AP2M1 |
|  |  |  | RALYL |
|  |  |  | IL32 |
|  |  |  | CATSPERD |
|  |  |  | GTF2H2D |
|  |  |  | MKRN7P |
|  |  |  | SNHG3 |
|  |  |  | GRM5 |
|  |  |  | THRB |
|  |  |  | RPLP0P2 |
|  |  |  | MMP11 |
|  |  |  | MMP14 |
|  |  |  | TRIM56 |
|  |  |  | LAMP3 |
|  |  |  | TSPAN3 |
|  |  |  | PCK2 |
|  |  |  | FCN3 |
|  |  |  | SEMA3B |
|  |  |  | STARD8 |
|  |  |  | PPM1N |
|  |  |  | SNORD68 |
|  |  |  | NOS3 |
|  |  |  | PACS2 |
|  |  |  | GCNT1 |
|  |  |  | MYEOV |
|  |  |  | SLC52A2 |
|  |  |  | CTTNBP2 |
|  |  |  | CATSPERB |
|  |  |  | BOK |
|  |  |  | ABCA7 |
|  |  |  | ATG4D |
|  |  |  | CECR6 |
|  |  |  | MT2A |
|  |  |  | PLXNB1 |
|  |  |  | PDLIM2 |
|  |  |  | MYBPC3 |
|  |  |  | TYROBP |
|  |  |  | SIVA1 |
|  |  |  | HLA-C |
|  |  |  | LRRC4 |
|  |  |  | GAPT |
|  |  |  | FPR3 |
|  |  |  | FANCG |
|  |  |  | DEXI |
|  |  |  | C13orf45 |
|  |  |  | F3 |
|  |  |  | USP12 |
|  |  |  | DTX3L |
|  |  |  | KANSL1-AS1 |
|  |  |  | LETM1 |
|  |  |  | IDH3G |
|  |  |  | MTHFS |
|  |  |  | KDM2B |
|  |  |  | RAB32 |
|  |  |  | CLEC11A |
|  |  |  | FAM195B |
|  |  |  | PRKD2 |
|  |  |  | VIMP |
|  |  |  | RPS6KA4 |
|  |  |  | AP5B1 |
|  |  |  | PLSCR1 |
|  |  |  | ZNF460 |
|  |  |  | DNAJB5 |
|  |  |  | PRG4 |
|  |  |  | MILR1 |
|  |  |  | GPRC5C |
|  |  |  | BIK |
|  |  |  | MIF4GD |
|  |  |  | MYO7B |
|  |  |  | TLL1 |
|  |  |  | CD320 |
|  |  |  | NPTX2 |
|  |  |  | MED16 |
|  |  |  | MEIS3 |
|  |  |  | ACSL5 |
|  |  |  | CRIP2 |
|  |  |  | SLC7A5P1 |
|  |  |  | SLC38A2 |
|  |  |  | ADAM15 |
|  |  |  | ZNF259 |
|  |  |  | CD33 |
|  |  |  | ALDH8A1 |
|  |  |  | ERF |
|  |  |  | PPCDC |
|  |  |  | GK |
|  |  |  | FBLN5 |
|  |  |  | TNFSF13B |
|  |  |  | WFDC3 |
|  |  |  | ADO |
|  |  |  | FAM105A |
|  |  |  | CD58 |
|  |  |  | FIBP |
|  |  |  | KMO |
|  |  |  | SMPDL3B |
|  |  |  | KRI1 |
|  |  |  | RFNG |
|  |  |  | C1orf106 |
|  |  |  | SPOCD1 |
|  |  |  | BCL2L1 |
|  |  |  | BAK1 |
|  |  |  | E4F1 |
|  |  |  | PRDX5 |
|  |  |  | PTGER3 |
|  |  |  | DNTTIP1 |
|  |  |  | AMZ1 |
|  |  |  | FEM1A |
|  |  |  | KCTD11 |
|  |  |  | ADIRF |
|  |  |  | TRAF7 |
|  |  |  | NPFFR1 |
|  |  |  | IL15 |
|  |  |  | DUSP8 |
|  |  |  | SLFNL1-AS1 |
|  |  |  | AGAP8 |
|  |  |  | EFNB1 |
|  |  |  | CCDC124 |
|  |  |  | WIZ |
|  |  |  | SYS1 |
|  |  |  | HBA2 |
|  |  |  | NUDT8 |
|  |  |  | PHKA2-AS1 |
|  |  |  | RAB11FIP1 |
|  |  |  | SLC6A17 |
|  |  |  | CDH13 |
|  |  |  | MFNG |
|  |  |  | TNFRSF21 |
|  |  |  | ACTBL2 |
|  |  |  | MMRN2 |
|  |  |  | MGLL |
|  |  |  | PTGS2 |
|  |  |  | UBALD1 |
|  |  |  | PLCB3 |
|  |  |  | CCDC130 |
|  |  |  | PTK2B |
|  |  |  | LENG9 |
|  |  |  | GRWD1 |
|  |  |  | DGKI |
|  |  |  | GLOD5 |
|  |  |  | ARC |
|  |  |  | PYCRL |
|  |  |  | IGFL1 |
|  |  |  | FGF18 |
|  |  |  | VWA5A |
|  |  |  | CTBP1 |
|  |  |  | C1QTNF6 |
|  |  |  | CYP4F11 |
|  |  |  | FBXO6 |
|  |  |  | ABI3 |
|  |  |  | IGHMBP2 |
|  |  |  | GPX3 |
|  |  |  | TMPRSS4 |
|  |  |  | AK5 |
|  |  |  | OASL |
|  |  |  | IL4I1 |
|  |  |  | SAMD3 |
|  |  |  | PDE4A |
|  |  |  | GRIA4 |
|  |  |  | ANKRD13D |
|  |  |  | HDAC7 |
|  |  |  | MICALL2 |
|  |  |  | SERPINB4 |
|  |  |  | BIN1 |
|  |  |  | TNFSF18 |
|  |  |  | IGFL2 |
|  |  |  | B3GNT7 |
|  |  |  | HIST1H4J |
|  |  |  | C17orf96 |
|  |  |  | AVPR1A |
|  |  |  | SLC7A4 |
|  |  |  | HLA-DPA1 |
|  |  |  | SLC16A5 |
|  |  |  | LONRF3 |
|  |  |  | ELMO3 |
|  |  |  | ABLIM2 |
|  |  |  | LOC146880 |
|  |  |  | GCHFR |
|  |  |  | CTHRC1 |
|  |  |  | HIST3H2BB |
|  |  |  | FAM195A |
|  |  |  | KLRG2 |
|  |  |  | LRRC41 |
|  |  |  | LOC100506060 |
|  |  |  | KRT23 |
|  |  |  | ABCF3 |
|  |  |  | HIST2H2AC |
|  |  |  | LDLRAD1 |
|  |  |  | PDE9A |
|  |  |  | LILRB2 |
|  |  |  | ARTN |
|  |  |  | PLEKHG3 |
|  |  |  | UBASH3B |
|  |  |  | DNAJC6 |
|  |  |  | TNFAIP8L2 |
|  |  |  | MYBPH |
|  |  |  | SPNS3 |
|  |  |  | ARL6IP4 |
|  |  |  | PPP1R14B |
|  |  |  | IVL |
|  |  |  | TNFSF9 |
|  |  |  | XAF1 |
|  |  |  | RGS2 |
|  |  |  | ISG15 |
|  |  |  | WDR45B |
|  |  |  | CLDN3 |
|  |  |  | MS4A14 |
|  |  |  | GIMAP1 |
|  |  |  | ADAMTS12 |
|  |  |  | IL18RAP |
|  |  |  | GMEB1 |
|  |  |  | PPAPDC2 |
|  |  |  | GABRG3 |
|  |  |  | MPND |
|  |  |  | TESK1 |
|  |  |  | THBS2 |
|  |  |  | PLAC4 |
|  |  |  | PDHA1 |
|  |  |  | CTNND1 |
|  |  |  | ITPKB |
|  |  |  | FAM46B |
|  |  |  | DPM3 |
|  |  |  | DFNB31 |
|  |  |  | RCN3 |
|  |  |  | ZNF324 |
|  |  |  | FAM89A |
|  |  |  | ZNF26 |
|  |  |  | LYPLA2 |
|  |  |  | IMP4 |
|  |  |  | TTC16 |
|  |  |  | SLC44A2 |
|  |  |  | PVR |
|  |  |  | TPD52L2 |
|  |  |  | BTBD19 |
|  |  |  | AUP1 |
|  |  |  | EMR3 |
|  |  |  | 2-Mar |
|  |  |  | CAPN5 |
|  |  |  | SASH3 |
|  |  |  | ATG2A |
|  |  |  | UPB1 |
|  |  |  | FAM189A1 |
|  |  |  | TADA2B |
|  |  |  | HTR3A |
|  |  |  | NTHL1 |
|  |  |  | NOL12 |
|  |  |  | MIDN |
|  |  |  | GRASP |
|  |  |  | LIME1 |
|  |  |  | MMD |
|  |  |  | ZNF668 |
|  |  |  | PRUNE2 |
|  |  |  | ADAMDEC1 |
|  |  |  | MBOAT7 |
|  |  |  | PADI4 |
|  |  |  | NDUFA7 |
|  |  |  | HAPLN1 |
|  |  |  | RNF5P1 |
|  |  |  | ANKRD24 |
|  |  |  | PLEKHM1P |
|  |  |  | SPSB3 |
|  |  |  | MXD4 |
|  |  |  | AGPAT2 |
|  |  |  | F2 |
|  |  |  | RDH14 |
|  |  |  | LOC646999 |
|  |  |  | SLC9A3R1 |
|  |  |  | RAB24 |
|  |  |  | HSF1 |
|  |  |  | SPOCK2 |
|  |  |  | KBTBD8 |
|  |  |  | BACE2 |
|  |  |  | ASMT |
|  |  |  | LOC158572 |
|  |  |  | CSGALNACT2 |
|  |  |  | GATSL3 |
|  |  |  | NECAB3 |
|  |  |  | TIMM44 |
|  |  |  | MOB1A |
|  |  |  | ORAI2 |
|  |  |  | SUSD2 |
|  |  |  | RABEP2 |
|  |  |  | C8orf4 |
|  |  |  | OSCAR |
|  |  |  | SH3BP2 |
|  |  |  | P2RX7 |
|  |  |  | RAB3IL1 |
|  |  |  | ADAP2 |
|  |  |  | PLA2G7 |
|  |  |  | MFI2 |
|  |  |  | ATP6V1G1 |
|  |  |  | B3GALT1 |
|  |  |  | MICB |
|  |  |  | NLRP2 |
|  |  |  | MMP25 |
|  |  |  | PI4KAP2 |
|  |  |  | IBSP |
|  |  |  | MUC20 |
|  |  |  | ANKRD20A11P |
|  |  |  | LRCH4 |
|  |  |  | IL15RA |
|  |  |  | CD69 |
|  |  |  | RASSF7 |
|  |  |  | BLVRB |
|  |  |  | C16orf13 |
|  |  |  | AKR7A3 |
|  |  |  | C22orf28 |
|  |  |  | RNF207 |
|  |  |  | FCGBP |
|  |  |  | TG |
|  |  |  | PTPRH |
|  |  |  | PCDH17 |
|  |  |  | MLST8 |
|  |  |  | KAT5 |
|  |  |  | ADRA2C |
|  |  |  | VPS28 |
|  |  |  | EMR2 |
|  |  |  | HLA-F |
|  |  |  | RASSF2 |
|  |  |  | MAP1S |
|  |  |  | VPS13A |
|  |  |  | MUC1 |
|  |  |  | DPP4 |
|  |  |  | TGM1 |
|  |  |  | VPS51 |
|  |  |  | KIAA0226L |
|  |  |  | TARP |
|  |  |  | GUSBP11 |
|  |  |  | CA1 |
|  |  |  | FAM84B |
|  |  |  | HIGD1B |
|  |  |  | RARRES2 |
|  |  |  | PHLDA2 |
|  |  |  | MIR24-2 |
|  |  |  | SYNE3 |
|  |  |  | PTGES2 |
|  |  |  | PGAP3 |
|  |  |  | LFNG |
|  |  |  | RARG |
|  |  |  | BMP8A |
|  |  |  | STIM1 |
|  |  |  | APOC1P1 |
|  |  |  | MIB2 |
|  |  |  | IFI44L |
|  |  |  | NPAS1 |
|  |  |  | FAM83H |
|  |  |  | ZDHHC11 |
|  |  |  | ALDOA |
|  |  |  | CCL18 |
|  |  |  | GAS5 |
|  |  |  | TBCD |
|  |  |  | ADRA2A |
|  |  |  | RFX8 |
|  |  |  | TUBA1B |
|  |  |  | TMC8 |
|  |  |  | FBXO21 |
|  |  |  | BCAM |
|  |  |  | ARAP2 |
|  |  |  | EMR1 |
|  |  |  | HAL |
|  |  |  | MCRS1 |
|  |  |  | PTRH1 |
|  |  |  | SLC2A6 |
|  |  |  | SNHG7 |
|  |  |  | AQP9 |
|  |  |  | INHBB |
|  |  |  | FAM25A |
|  |  |  | RBM38 |
|  |  |  | CD109 |
|  |  |  | MMP23B |
|  |  |  | PAK4 |
|  |  |  | POMC |
|  |  |  | F2RL3 |
|  |  |  | ADCY10P1 |
|  |  |  | ARSI |
|  |  |  | FPGS |
|  |  |  | NAPSB |
|  |  |  | CAMK2A |
|  |  |  | LYNX1 |
|  |  |  | UPK3B |
|  |  |  | HLA-DPB1 |
|  |  |  | SF3A1 |
|  |  |  | RRAS |
|  |  |  | TOR2A |
|  |  |  | APBB1IP |
|  |  |  | EVI2B |
|  |  |  | NCOA4 |
|  |  |  | CYP2D6 |
|  |  |  | LOC407835 |
|  |  |  | SNX29 |
|  |  |  | TAF4 |
|  |  |  | ARL8A |
|  |  |  | REG1A |
|  |  |  | B3GAT3 |
|  |  |  | MYO5B |
|  |  |  | C17orf70 |
|  |  |  | FIBCD1 |
|  |  |  | DGCR2 |
|  |  |  | MMP10 |
|  |  |  | DDI2 |
|  |  |  | ASAP2 |
|  |  |  | RAPGEFL1 |
|  |  |  | YRDC |
|  |  |  | CD74 |
|  |  |  | RTEL1-TNFRSF6B |
|  |  |  | MFSD10 |
|  |  |  | SERPINA3 |
|  |  |  | GPR157 |
|  |  |  | LOC619207 |
|  |  |  | SCAF1 |
|  |  |  | GOLGA6L10 |
|  |  |  | ECM1 |
|  |  |  | BCL9L |
|  |  |  | MMP1 |
|  |  |  | ITGAM |
|  |  |  | UCP2 |
|  |  |  | SS18L1 |
|  |  |  | PROCR |
|  |  |  | JHDM1D |
|  |  |  | PTAR1 |
|  |  |  | ACSS2 |
|  |  |  | AMDHD1 |
|  |  |  | KCNK9 |
|  |  |  | FUT6 |
|  |  |  | ITGA11 |
|  |  |  | RNF128 |
|  |  |  | ADIG |
|  |  |  | GAS6 |
|  |  |  | MS4A4A |
|  |  |  | FOXK1 |
|  |  |  | TNC |
|  |  |  | CH25H |
|  |  |  | PDLIM4 |
|  |  |  | TRMT61A |
|  |  |  | SH3RF1 |
|  |  |  | TAP1 |
|  |  |  | ST3GAL1 |
|  |  |  | CCDC9 |
|  |  |  | ARL11 |
|  |  |  | FAM43A |
|  |  |  | FRAT1 |
|  |  |  | PDE6B |
|  |  |  | MICAL1 |
|  |  |  | ZNF705A |
|  |  |  | FAM21B |
|  |  |  | RNF150 |
|  |  |  | SLC2A5 |
|  |  |  | TKTL1 |
|  |  |  | SNAI3 |
|  |  |  | HLCS |
|  |  |  | BHLHE40-AS1 |
|  |  |  | C19orf24 |
|  |  |  | MMP15 |
|  |  |  | GHRL |
|  |  |  | SIX4 |
|  |  |  | ARHGAP39 |
|  |  |  | DDX49 |
|  |  |  | CD83 |
|  |  |  | FCGR1B |
|  |  |  | ZNRF2P2 |
|  |  |  | TSC22D4 |
|  |  |  | NQO2 |
|  |  |  | EPGN |
|  |  |  | TIMP4 |
|  |  |  | HUS1B |
|  |  |  | NDUFS7 |
|  |  |  | MSC |
|  |  |  | ATHL1 |
|  |  |  | EME2 |
|  |  |  | MYCT1 |
|  |  |  | TRIM29 |
|  |  |  | APLNR |
|  |  |  | UBE2L6 |
|  |  |  | PIDD |
|  |  |  | MDGA1 |
|  |  |  | DOK7 |
|  |  |  | NOTCH2NL |
|  |  |  | SEPN1 |
|  |  |  | AIFM1 |
|  |  |  | ANKRD33B |
|  |  |  | TMEM238 |
|  |  |  | CCDC144C |
|  |  |  | POTEM |
|  |  |  | KIAA1644 |
|  |  |  | LOC399753 |
|  |  |  | SUV420H2 |
|  |  |  | CASZ1 |
|  |  |  | KCNJ10 |
|  |  |  | SLC39A4 |
|  |  |  | IFITM3 |
|  |  |  | FCGR3A |
|  |  |  | SPTB |
|  |  |  | RNASE1 |
|  |  |  | KRT86 |
|  |  |  | SMARCB1 |
|  |  |  | ITGB8 |
|  |  |  | KIAA1522 |
|  |  |  | TRAF3IP3 |
|  |  |  | CLCN7 |
|  |  |  | RNPEP |
|  |  |  | RECQL4 |
|  |  |  | HAGH |
|  |  |  | C15orf52 |
|  |  |  | GATAD2A |
|  |  |  | TNF |
|  |  |  | LIMK1 |
|  |  |  | ATG4B |
|  |  |  | KPNA7 |
|  |  |  | MEOX1 |
|  |  |  | ATF3 |
|  |  |  | SMPDL3A |
|  |  |  | RDH13 |
|  |  |  | ZXDC |
|  |  |  | SAMD10 |
|  |  |  | BACE1 |
|  |  |  | AMN |
|  |  |  | NFKBIB |
|  |  |  | FKBP5 |
|  |  |  | GPR68 |
|  |  |  | DEFB4A |
|  |  |  | RCSD1 |
|  |  |  | C12orf68 |
|  |  |  | MPG |
|  |  |  | B3GNT3 |
|  |  |  | CSF2RA |
|  |  |  | MYO1G |
|  |  |  | DDT |
|  |  |  | IL18BP |
|  |  |  | ZNF771 |
|  |  |  | TCN2 |
|  |  |  | UFSP1 |
|  |  |  | TARBP2 |
|  |  |  | CNTNAP3B |
|  |  |  | EDAR |
|  |  |  | TJP3 |
|  |  |  | LRTOMT |
|  |  |  | ITGB7 |
|  |  |  | LOC100507463 |
|  |  |  | ARHGAP26 |
|  |  |  | TAF13 |
|  |  |  | KCNRG |
|  |  |  | TNFRSF10B |
|  |  |  | COL13A1 |
|  |  |  | TLE1 |
|  |  |  | LOC644961 |
|  |  |  | ULBP1 |
|  |  |  | VEGFC |
|  |  |  | NLRC4 |
|  |  |  | CAMKK1 |
|  |  |  | TWIST2 |
|  |  |  | FBXL6 |
|  |  |  | CTIF |
|  |  |  | TNFRSF9 |
|  |  |  | CHCHD10 |
|  |  |  | DLST |
|  |  |  | PRDM8 |
|  |  |  | RGS19 |
|  |  |  | SNPH |
|  |  |  | SLC1A5 |
|  |  |  | ISYNA1 |
|  |  |  | SCIMP |
|  |  |  | ATP8B3 |
|  |  |  | UBAP1L |
|  |  |  | CPA3 |
|  |  |  | CITED4 |
|  |  |  | ATP9A |
|  |  |  | PFKFB1 |
|  |  |  | OMP |
|  |  |  | RIMS3 |
|  |  |  | COL5A1 |
|  |  |  | AXIN1 |
|  |  |  | TSEN54 |
|  |  |  | TMEM189 |
|  |  |  | FKBP1A |
|  |  |  | CHRNA1 |
|  |  |  | ATP5L2 |
|  |  |  | NSUN5P1 |
|  |  |  | EXOC3L2 |
|  |  |  | SLC2A9 |
|  |  |  | DCAF15 |
|  |  |  | SLC35D3 |
|  |  |  | PHF13 |
|  |  |  | HYOU1 |
|  |  |  | ICAM3 |
|  |  |  | MS4A2 |
|  |  |  | SCRIB |
|  |  |  | CBLC |
|  |  |  | CCDC87 |
|  |  |  | DHCR24 |
|  |  |  | SGCG |
|  |  |  | TNFRSF11A |
|  |  |  | LOC256021 |
|  |  |  | ERCC5 |
|  |  |  | GP5 |
|  |  |  | SPATA2 |
|  |  |  | CAMK2B |
|  |  |  | NUDT16L1 |
|  |  |  | AGAP6 |
|  |  |  | RUNX3 |
|  |  |  | LAMA3 |
|  |  |  | UCKL1 |
|  |  |  | CORO2A |
|  |  |  | RPGRIP1 |
|  |  |  | NR4A3 |
|  |  |  | CGN |
|  |  |  | COX16 |
|  |  |  | BMP1 |
|  |  |  | SLC12A4 |
|  |  |  | GADD45GIP1 |
|  |  |  | CNKSR1 |
|  |  |  | PTAFR |
|  |  |  | C17orf103 |
|  |  |  | AARS2 |
|  |  |  | MFSD7 |
|  |  |  | PAPPA |
|  |  |  | ARFIP2 |
|  |  |  | ADAP1 |
|  |  |  | AIM1L |
|  |  |  | NPEPL1 |
|  |  |  | ADORA2B |
|  |  |  | PWWP2B |
|  |  |  | CPNE7 |
|  |  |  | C9orf47 |
|  |  |  | CYP2C9 |
|  |  |  | ALPK3 |
|  |  |  | DUSP2 |
|  |  |  | E2F4 |
